WINTER 2023 | VOLUME 21 | NUMBER 1

# Focus

The Journal of Lifelong Learning in Psychiatry

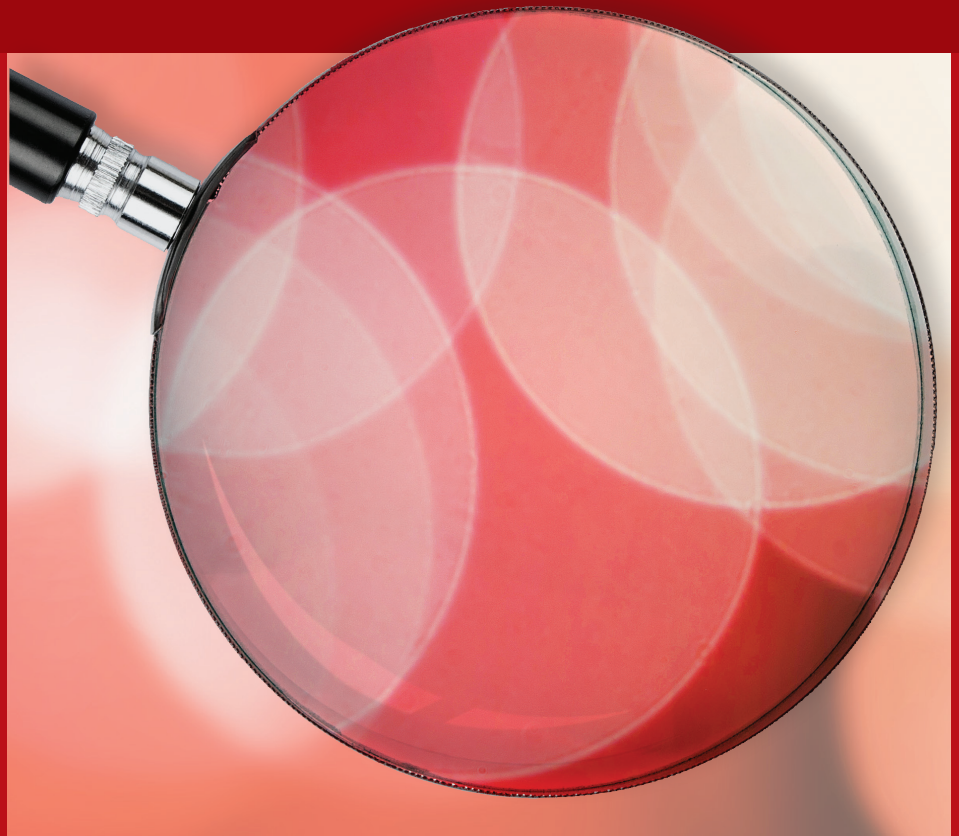

## Emergency Psychiatry: Updates, Future Directions, and Core Concepts

Guest Editor: Tony Thrasher, D.O., M.B.A.

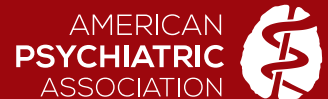

[focus.psychiatryonline.org](http://focus.psychiatryonline.org)
